# Supplementary material for: Broad bandwidth emission and in situ electric field modulation of photoluminescence in Nd-doped ferroelectric crystals
Source: Royal Society of Chemistry journal article supplement (doi:10.1039/d0cc06304e), 2020-12-09
Supplement: d0cc06304e1.pdf [file d0cc06304e1.pdf]

## Electronic Supplementary Information

### **Broad bandwidth emission and in situ electric field modulation of photoluminescence in Nd-doped ferroelectric crystals**

Lan Xu <sup>a,b</sup>, Zujian Wang<sup>a</sup>, Bin Su<sup>a,c</sup>, Junjie Xiong<sup>a,c</sup>, Xiaoming Yang<sup>a</sup>, Rongbing Su <sup>a</sup>,  
Chao He<sup>\*,a,b,c</sup>, and Xifa Long<sup>\*,a,b,c</sup>

<sup>a</sup> Key Laboratory of Optoelectronic Materials Chemistry and Physics, Fujian Institute of Research on the Structure of Matter, Chinese Academy of Sciences, Fuzhou, 350002, China

<sup>b</sup> Fujian Science & Technology Innovation Laboratory for Optoelectronic Information of China, Fuzhou, 350108, China

<sup>c</sup> Fujian College, University of Chinese Academy of Sciences, Fuzhou, 350002, China

\*Corresponding author: hechao@fjirsm.ac.cn, lxf@fjirsm.ac.cn

#### **Experimental Section:**

The Nd-doped ferroelectric crystals  $(\text{Pb}_{0.97}\text{Nd}_{0.02})[(\text{Mg}_{1/3}\text{Nb}_{2/3})_{0.61}\text{Ti}_{0.39}]\text{O}_3$  [Nd:PMNT] with tetragonal perovskite structure were grown by top-seeded solution-growth method.<sup>[1]</sup> The plates were sliced along the  $\langle 001 \rangle$  direction for electrical, photoluminescence performance measurements. The transparent indium tin oxide (ITO) was deposited on both sides of samples using magnetron sputtering system for photoluminescence response measurement. The polarization-electric field ( $P$ - $E$ ) hysteresis loop and current vs electric field ( $I$ - $V$ ) curve were measured using a ferroelectric analyzer (TF2000, aix-ACCT, Germany). The piezoresponse images before and after poling through an explanted direct current power source were observed by a piezoresponse force microscopy (PFM, Cypher ES, Asylum Research, USA) using conductive probes (ASYELEC-01, Asylum Research, USA) at room temperature. A UV/V/NIR fluorescence spectrometer (FLS980, Edinburgh Instruments, England) was used to measure photoluminescence (PL) response.

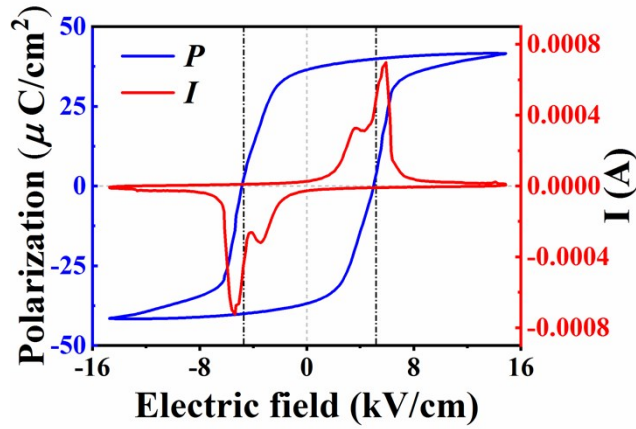

**Fig. S1** The ferroelectric polarization-electric field ( $P$ - $E$ ) hysteresis loop and the current-electric field ( $I$ - $E$ ) curve of Nd:PMNT single crystal. The values of the remanent polarization ( $P_r$ ) and coercive field ( $E_C$ ) were  $36.7 \mu\text{C}/\text{cm}^2$  and  $4.91 \text{ kV}/\text{cm}$ , respectively.

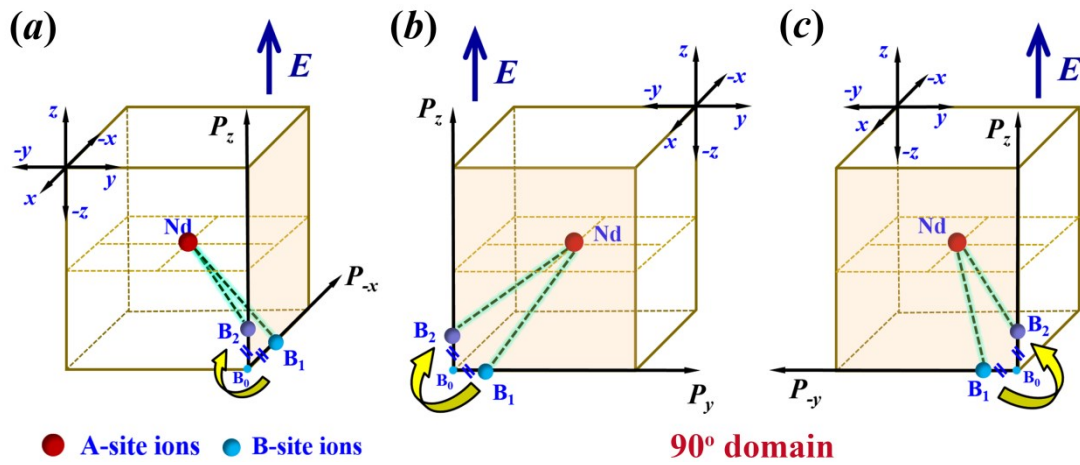

**Fig. S2** Schematic diagram of the interaction between  $\text{Nd}^{3+}$  ions and B-site ions moving from a  $B_1$  position to a  $B_2$  position, when the  $90^\circ$  domains switching induced by an external electric field.

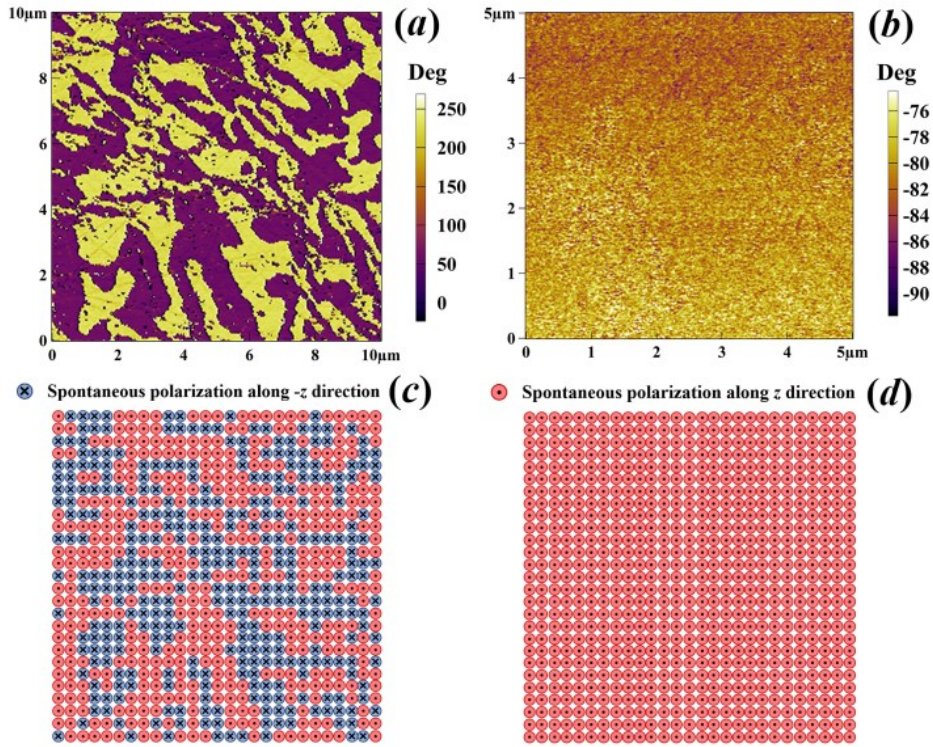

**Fig. S3** The PFM phase image of a Nd:PMNT crystal under (a) zero field ( $10\ \mu\text{m}\times 10\ \mu\text{m}$ ) and (b) a coercive field along the  $z$  direction ( $5\ \mu\text{m}\times 5\ \mu\text{m}$ ). The schematic diagram is the distribution of the  $180^\circ$  domain (c) in the virgin sample and (d) under the coercive electric field along the  $z$  direction.

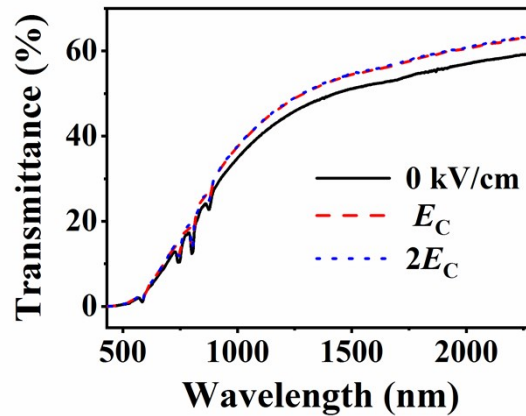

**Fig. S4** Transmittance of Nd:PMNT crystals under the electric field of  $0\ \text{kV/cm}$ ,  $E_C$  and  $2E_C$ . The transmittance was increased by about 6.4% from  $0\ \text{kV/cm}$  to  $E_C$ , and by about 0.6% from  $E_C$  to  $2E_C$ .

## Reference

- [1] X. Long, Z.-G. Ye, *Acta Mater.*, 2007, **55**, 6507-6512.
